# Supplementary material
Source: PubMed Central journal article supplement (PMC3121464)
Supplement: supp_M110.182436_SupplementalData.pdf [file supp_M110.182436_SupplementalData.pdf]

**Conservation and variability of NS5A domain D3 amino acids sequence from various HCV genotypes.** *A* and *B*, amino acid repertoires of NS5A domain D3 from genotype 1b and 2a, respectively. The NS5A-D3 aa 359–447 sequence from HCV Con1 strain (AJ238799 ; genotype 1b) and aa 355–466 sequence from HCV JFH1 strain (AB047639 ; genotype 2a) are indicated with respect to the respective NS5A proteins numbering and polyproteins numbering. The *hyphens* indicate the amino acid gap compared with the multiple sequence alignment of D3 from representative HCV genotypes (panel *C*, see below). The aa repertoires were deduced from the ClustalW multiple alignments of 363 and 21 NS5A sequences of genotypes 1b (panel *A*) and 2a (panel *B*), respectively. Amino acids observed at a given position in fewer than three distinct sequences (1%) for the former and two sequences for the latter were not included. The degree of aa conservation at each position can be inferred from the extent of variability (with the observed aa listed in decreasing order of frequency from top to bottom) together with the similarity index according to ClustalW convention (*asterisk*, invariant; *colon*, highly similar; *dot*, similar ; (53)). *C*, multiple alignments of NS5A domain D3 from representative confirmed HCV genotypes and subtypes (listed with accession numbers in Table 1 in (106); for details, see the European HCV Database (<http://www.euhcvdb.fr>),(52)). Numbering of residues refers to NS5A protein of genotype 1a, H77 strain (AF009606), as recommended (107). Amino acids that are invariant, highly similar, or similar in any genotypes are colored in red, green and blue, respectively. Amino acid positions shaded in grey indicate the amino acids that are strictly conserved in any HCV reference genotypes. Amino acid positions consensually predicted to adopt an alpha helical fold are shaded in yellow. These consensus helical folds were deduced from a large set of prediction methods available at the NPSA website, including DSC, HNNC, MLRC, PHD, Predator, SOPM, and SIMPA96 (<http://npsa-pbil.ibcp.fr/>; (51) and references therein).

Supplemental Figure 2

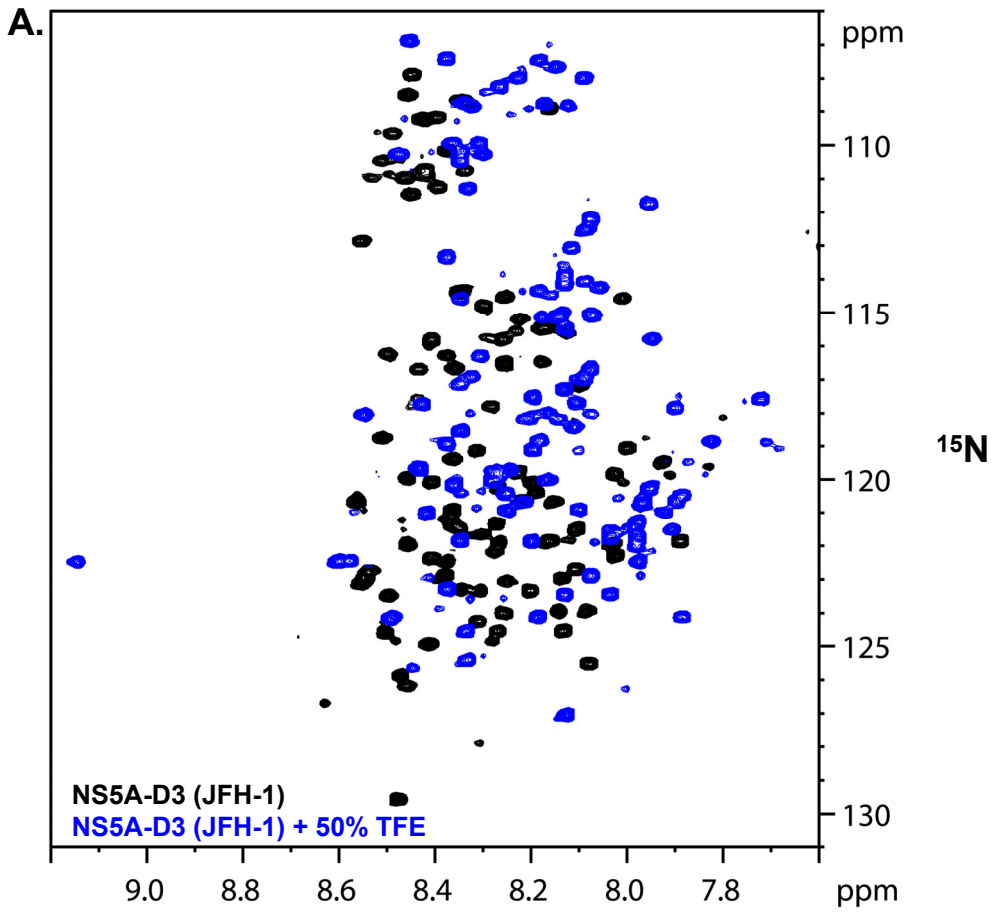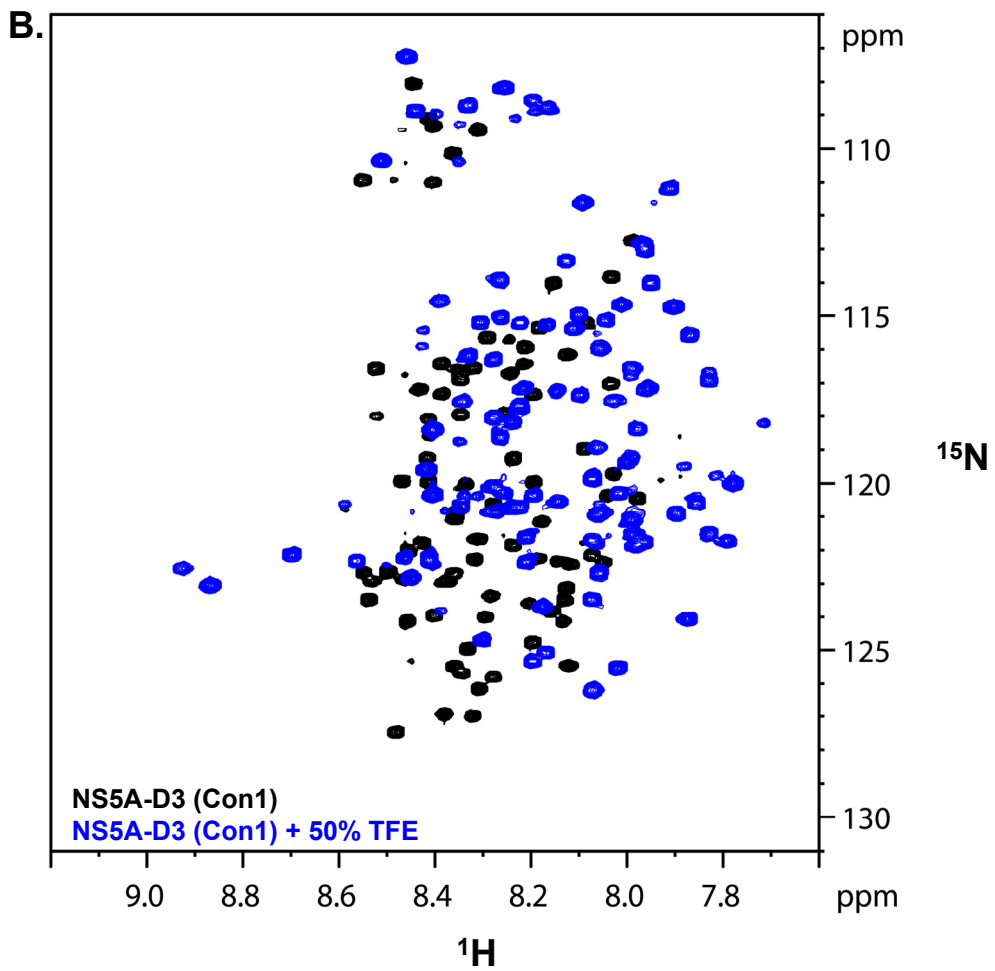

**$^1\text{H}$ ,  $^{15}\text{N}$  HSQC spectra of NS5A-D3 with or without 50% TFE.** Each panel corresponds to the superimposition of  $^1\text{H}$ ,  $^{15}\text{N}$ -HSQC spectra that have been acquired on NS5A-D3, from the JFH-1 (*A*) or the Con1 (*B*) HCV strains, without (black spectrum) or in the presence of 50% TFE (blue spectrum).

Supplemental Figure 3

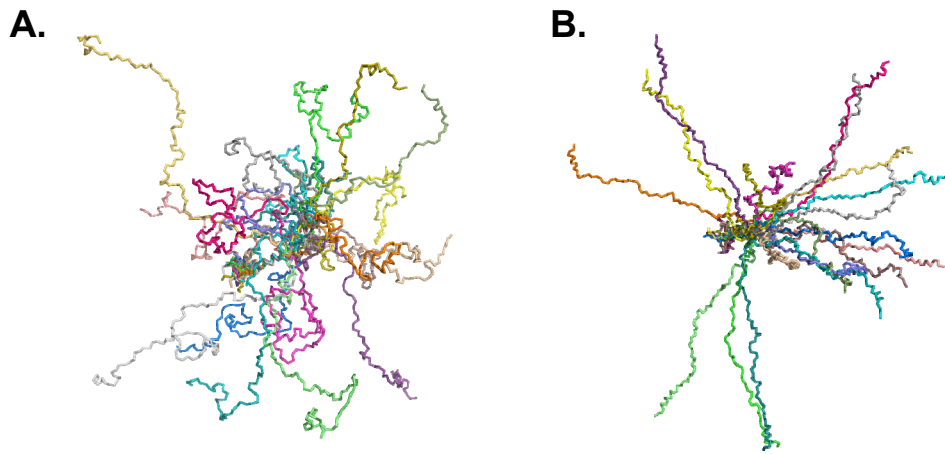

**NMR structure model of NS5A-D3 from JFH-1 (A) and Con1 (B) HCV strains in 50% TFE.** The 20 final structures for each NS5A-D3 have been superimposed on the backbone atoms (N, C<sub>α</sub> and C<sub>O</sub>) of the α1 helix located in the N-terminus. This illustrates that NS5A-D3 remains mainly unfolded even in presence of 50% TFE.

## Supplemental Figure 4

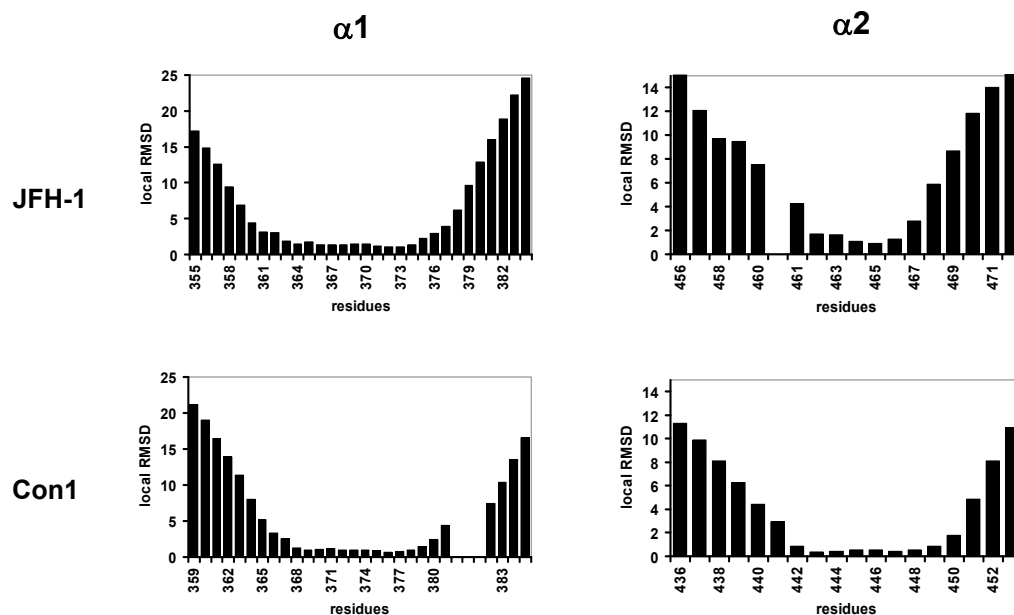

**Local RMSD ( $\text{\AA}$ ) values for the backbone atoms ( $N, C_{\alpha}$  and  $C_{O}$ ) of  $\alpha 1$  (left panels) and  $\alpha 2$  (right panels) helices in the final set of calculated structures of NS5A-D3 (JFH-1) (upper panels) and NS5A-D3 (Con1) (lower panels). The sequences of NS5A-D3 (JFH-1) and NS5A-D3 (Con1) were kept aligned as in Fig. 1.**

Supplemental Table 1

**Assignments of minor NMR resonances in the  $^1\text{H}$ ,  $^{15}\text{N}$ -HSQC spectrum of NS5A-D3 (JFH-1) that have been recorded in aqueous medium.**

| residue | $^1\text{H}$ | $^{15}\text{N}$ | $^{13}\text{C}\alpha$ | $^{13}\text{C}\beta$ | $^{13}\text{C}'$ |
|---------|--------------|-----------------|-----------------------|----------------------|------------------|
| T375    | 8.068        | 114.965         | 61.676                | 70.049               | 174.135          |
| F376    | 8.328        | 122.296         | 58.156                | 39.774               | 176.302          |
| G377    | 8.360        | 110.895         | 45.235                |                      | 172.744          |
| Q378    | 7.809        | 118.148         | 52.417                |                      | 173.893          |
| Q378    | 8.127        | 120.466         | 53.385                | 29.095               | 173.491          |
| T400c   | 8.558        | 115.898         | 62.288                | 69.809               | <i>nd</i>        |
| S401    | 8.118        | 118.227         | 55.674                | 64.204               | 173.867          |
| S401    | 8.529        | 119.778         | 56.413                | 63.484               | 174.339          |
| E404    | 7.837        | 119.620         | 53.505                | 31.385               | 174.615          |
| A406c   | 8.640        | 126.699         | 50.755                | 17.893               | 175.835          |
| A406    | 8.190        | 124.368         | 49.984                | 19.732               | 175.591          |
| E409    | 8.694        | 123.273         | 56.763                | 30.335               | 176.889          |
| S415    | 8.282        | 117.993         | 58.255                | 63.840               | <i>nd</i>        |
| M416    | 8.127        | 121.843         | 52.158                | 34.170               | 174.077          |
| L419c   | 8.695        | 124.739         | 55.214                | 42.037               | 177.357          |
| E420    | 8.473        | 121.535         | 56.636                | 30.468               | 176.903          |
| G421    | 8.483        | 110.438         | 45.313                |                      | 173.162          |
| G421    | 8.436        | 110.342         | 44.991                |                      | 173.682          |
| E422    | 7.919        | 119.893         | 53.817                | 30.832               | 174.821          |
| G424    | 8.530        | 109.621         | 45.077                |                      | 172.633          |
| D425    | 7.919        | 119.890         | 51.857                | 42.420               | 174.825          |
| D427c   | 8.556        | 120.951         | 54.144                | 41.094               | 176.770          |
| L428    | 8.350        | 123.914         | 55.256                | 42.455               | 178.072          |
| E429    | 8.477        | 121.233         | 56.752                | 30.130               | 176.903          |
| S430    | 8.231        | 116.322         | 58.903                | 63.844               | <i>nd</i>        |
| E434    | 8.491        | 124.852         | 56.278                | 30.398               | 176.046          |
| E434    | 8.519        | 124.280         | 56.522                | 30.228               | 176.195          |
| L435    | 8.290        | 124.869         | 55.231                | 42.580               | 175.790          |
| Q436    | 8.015        | 120.106         | 52.424                | 30.718               | 174.134          |
| G442    | 8.283        | 108.075         | 45.385                |                      | 174.796          |
| V444    | 7.972        | 118.767         | 61.893                | 33.072               | 175.272          |
| V444    | 8.042        | 118.882         | 61.845                | 32.966               | <i>nd</i>        |
| A445    | 8.314        | 127.898         | 50.602                | 18.919               | 175.966          |
| G447c   | 8.563        | 111.483         | 45.600                |                      | 174.073          |

c, indicates that the minor form is directly following a Proline residue in *cis* conformation

## Supplemental Table 2

## Statistics of the NMR structures models calculations of NS5A-D3 JFH-1 and Con1 in 50% TFE.

| Conditions                                                                                             | NS5A-D3_JFH1 (50% TFE)                       | NS5A-D3_Con1 (50% TFE)                       |
|--------------------------------------------------------------------------------------------------------|----------------------------------------------|----------------------------------------------|
| <b>Restrains used</b>                                                                                  |                                              |                                              |
| <b>Distance restraints</b>                                                                             |                                              |                                              |
| Intra-residue                                                                                          | 0                                            | 0                                            |
| Sequential                                                                                             | 48                                           | 44                                           |
| Medium range                                                                                           | 25                                           | 30                                           |
| Longe range                                                                                            | 0                                            | 0                                            |
| Total distance restraints                                                                              | 73                                           | 74                                           |
| <b>Angle restraints</b>                                                                                |                                              |                                              |
| <sup>3</sup> J <sub>HNH<math>\alpha</math></sub> couplings                                             | 16                                           | 19                                           |
| <b>Chemical shifts</b>                                                                                 |                                              |                                              |
| <sup>13</sup> C $\alpha$                                                                               | 113                                          | 93                                           |
| <sup>13</sup> C $\beta$                                                                                | 95                                           | 86                                           |
| <b>Statistics for the CNS accepted structures</b>                                                      |                                              |                                              |
| Number of accepted structures                                                                          | 111                                          | 65                                           |
| CNS energy (kcal.mol <sup>-1</sup> )                                                                   | 450±216                                      | 111±24                                       |
| <b>NOE violations</b>                                                                                  |                                              |                                              |
| Number > 0.5 Å                                                                                         | 0                                            | 0                                            |
| NOE r.m.s.d. (Å)                                                                                       | 0.007±0.006                                  | 0.006±0.005                                  |
| <b><sup>3</sup>J<sub>HNH<math>\alpha</math></sub> coupling violations (for <sup>3</sup>J &lt; 5Hz)</b> |                                              |                                              |
| Number > 1 Hz                                                                                          | 0                                            | 0                                            |
| <sup>3</sup> J <sub>HNH<math>\alpha</math></sub> r.m.s.d. (Hz)                                         | 0.257±0.073                                  | 0.211±0.063                                  |
| <b>Deviations from idealized covalent geometry</b>                                                     |                                              |                                              |
| r.m.s.d. bonds (Å)                                                                                     | 0.002±0.0006                                 | 0.002±0.0005                                 |
| r.m.s.d. angles (deg.)                                                                                 | 0.356±0.0285                                 | 0.316±0.0166                                 |
| r.m.s.d. improper (deg.)                                                                               | 0.232±0.0777                                 | 0.151±0.0220                                 |
| <b>Statistics for the 20 lowest energy final CNS structures</b>                                        |                                              |                                              |
| Number of structures in the final set                                                                  | 20                                           | 20                                           |
| CNS energy (kcal.mol <sup>-1</sup> )                                                                   | 92.204±11.037                                | 61.098±7.217                                 |
| NOE r.m.s.d. (Å)                                                                                       | 0.007±0.007                                  | 0.005±0.004                                  |
| <sup>3</sup> J <sub>HNH<math>\alpha</math></sub> r.m.s.d. (Hz)                                         | 0.273±0.078                                  | 0.208±0.061                                  |
| <b>Deviations from idealized covalent geometry</b>                                                     |                                              |                                              |
| r.m.s.d. bonds (Å)                                                                                     | 0.002±0.0004                                 | 0.001±0.0004                                 |
| r.m.s.d. angles (deg.)                                                                                 | 0.326±0.019                                  | 0.300±0.009                                  |
| r.m.s.d. improper (deg.)                                                                               | 0.175±0.044                                  | 0.133±0.010                                  |
| <b>Ramachandran data - <math>\alpha</math>1 helix</b>                                                  |                                              |                                              |
|                                                                                                        | <b>res. S360-G377</b>                        | <b>res. E365-G381</b>                        |
| Residues in most favoured regions (%)                                                                  | 100.0                                        | 81.2                                         |
| Residues in allowed regions (%)                                                                        | 0.0                                          | 12.5                                         |
| Residues in generously allowed regions (%)                                                             | 0.0                                          | 6.2                                          |
| Residues in disallowed regions (%)                                                                     | 0.0                                          | 0.0                                          |
| <b>Ramachandran data - <math>\alpha</math>2 helix</b>                                                  |                                              |                                              |
|                                                                                                        | <b>res. D461-V464 (+3 His)<sub>lag</sub></b> | <b>res. A440-V445 (+6 His)<sub>lag</sub></b> |
| Residues in most favoured regions (%)                                                                  | 80.0                                         | 70.0                                         |
| Residues in allowed regions (%)                                                                        | 20.0                                         | 20.0                                         |
| Residues in generously allowed regions (%)                                                             | 0.0                                          | 10.0                                         |
| Residues in disallowed regions (%)                                                                     | 0.0                                          | 0.0                                          |
| <b>Ramachandran data - full chain</b>                                                                  |                                              |                                              |
|                                                                                                        | <b>R355-V464 (+His-tag)</b>                  | <b>R359-V445 (+His-tag)</b>                  |
| Residues in most favoured regions (%)                                                                  | 48.8                                         | 51.2                                         |
| Residues in allowed regions (%)                                                                        | 38.1                                         | 37.5                                         |
| Residues in generously allowed regions (%)                                                             | 7.1                                          | 10.0                                         |
| Residues in disallowed regions (%)                                                                     | 6.0                                          | 1.2                                          |
